# Supplementary material for: Capillary electrophoresis-laser-induced fluorescence (CE-LIF)-based immunoassay for quantifying antibodies against cyclic citrullinated peptides
Source: Royal Society of Chemistry journal article supplement (doi:10.1039/c8an00714d), 2018-01-01
Supplement: c8an00714d1.pdf [file c8an00714d1.pdf]

**Supplementary material**

**Capillary electrophoresis-laser-induced fluorescence (CE-LIF)-based immunoassay for quantifying antibodies against cyclic citrullinated peptides**

**Binh Thanh Nguyen<sup>a, b, 1</sup>, Min Park<sup>c, d, 1</sup>, Young Sook Yoo<sup>a</sup>, Min-Jung Kang<sup>a, b\*</sup>**

<sup>a</sup> *Molecular Recognition Research Center, Korea Institute of Science and Technology (KIST), Seoul 02792, Korea*

<sup>b</sup> *Division of Bio-Medical Science and Technology (Biological Chemistry), University of Science and Technology (UST), Daejeon 34113, Korea.*

<sup>c</sup> *Department of Materials Science and Engineering, Hallym University, Chuncheon-si Korea.*

<sup>d</sup> *Integrative Materials Research Institute, Hallym University, Chuncheon-si, Korea.*

**Fig S1.** Electropherograms with different buffers and pH (a). F-CCP using 50 mM CAPS pH 9.3, (b) F-CCP using 50 mM Sodium borate pH 9.3 , (c) F-CCP using 50 mM sodium borate pH 10.0, (d) F-CCP using 100 mM sodium borate pH 9.3, (e) F-CCP using 25 mM sodium borate pH 9.3

(a)

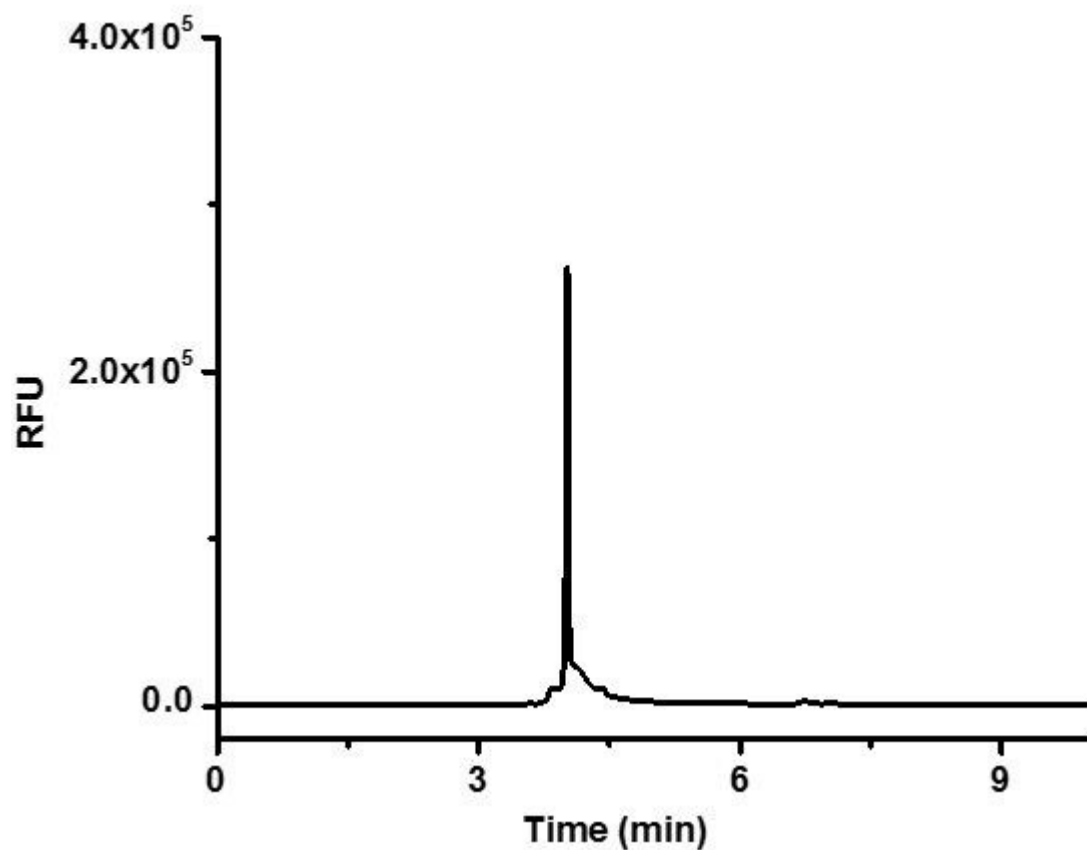

(b)

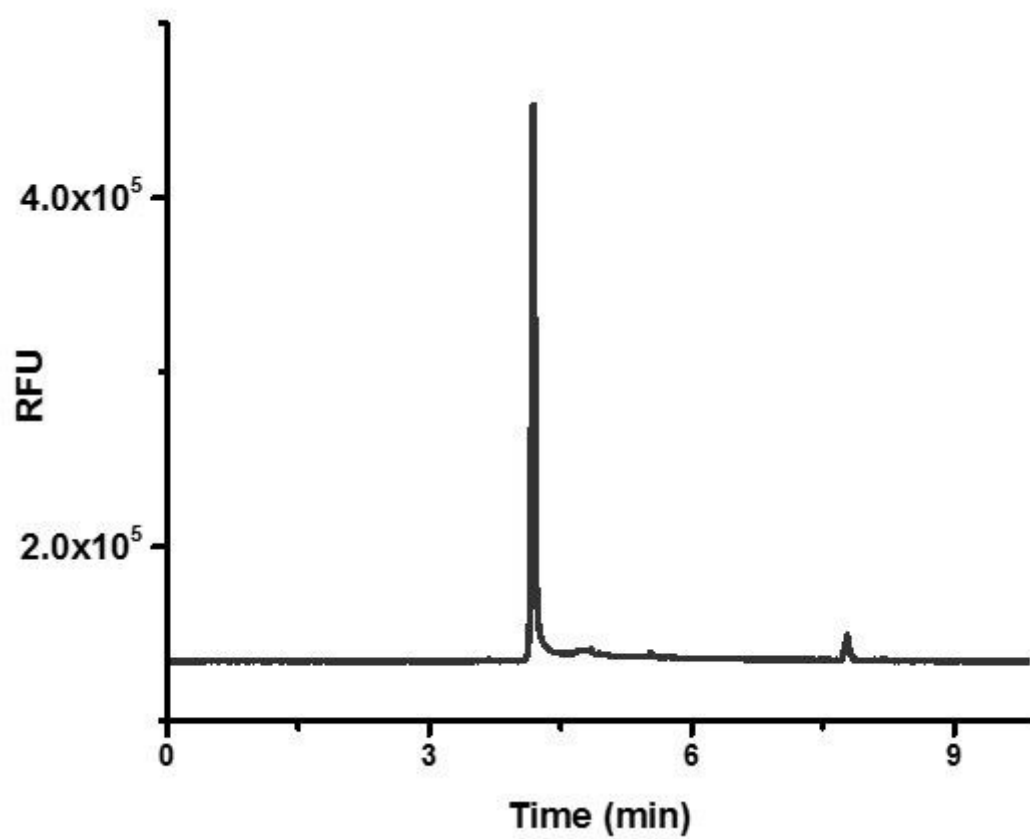

(c)

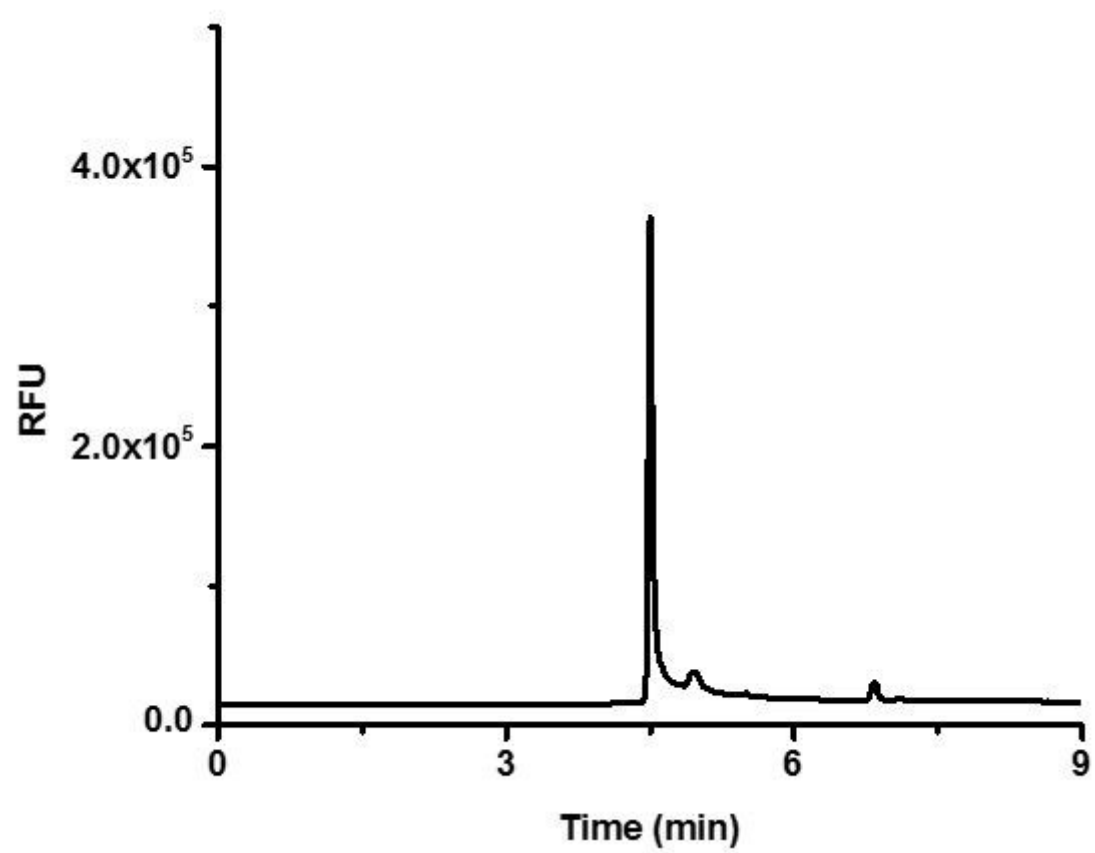

(d)

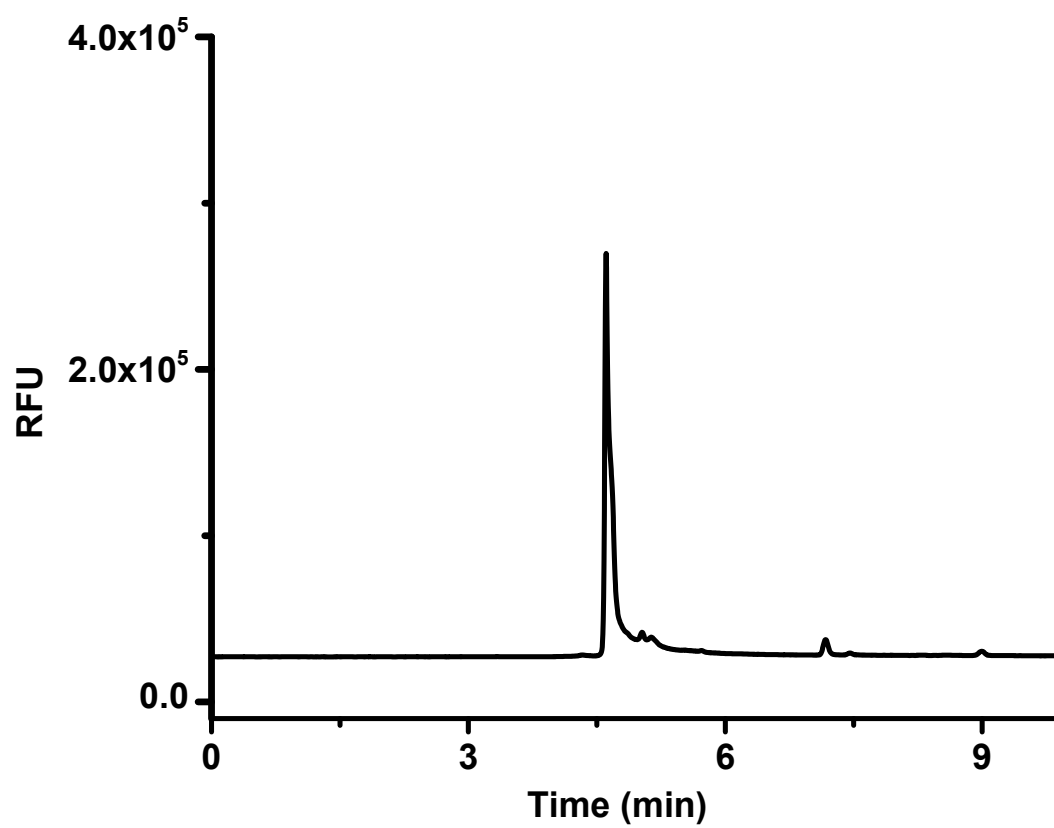

(e)

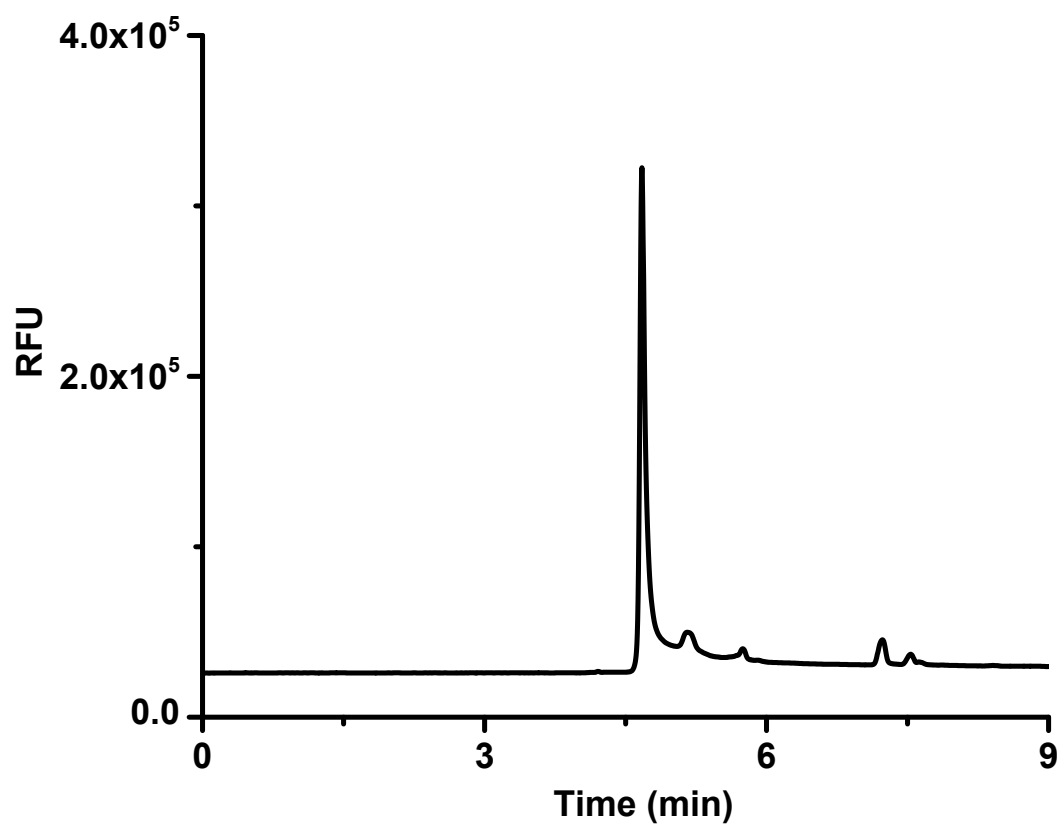

**Fig S2.** The peak profiles at LOD of F-CCP11A (4 ng/mL) and F-CCP (2 ng/mL)

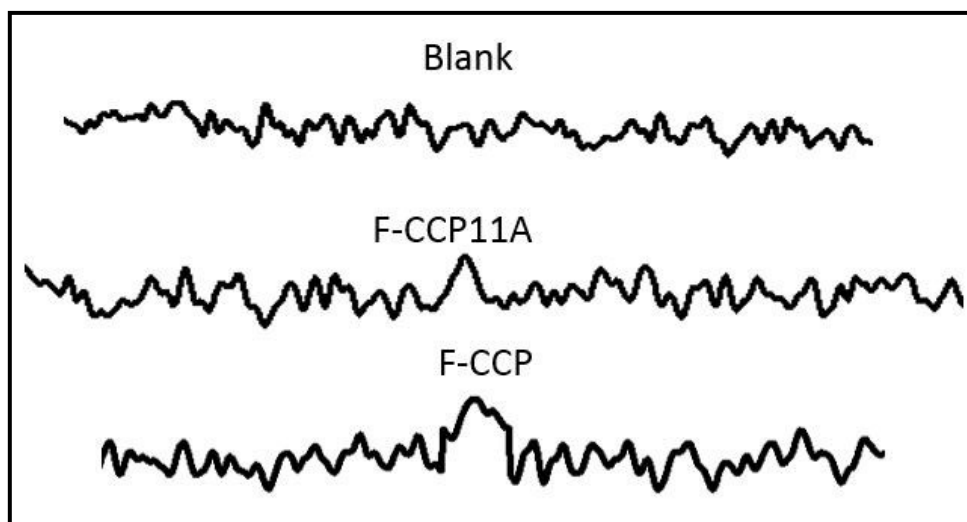

**Fig S3.** Standard curves plotted between peak area vs. concentration of a range from 0.008 – 1.0  $\mu\text{g/mL}$  (a) F-CCP11A and (b) F-CCP.

(a)

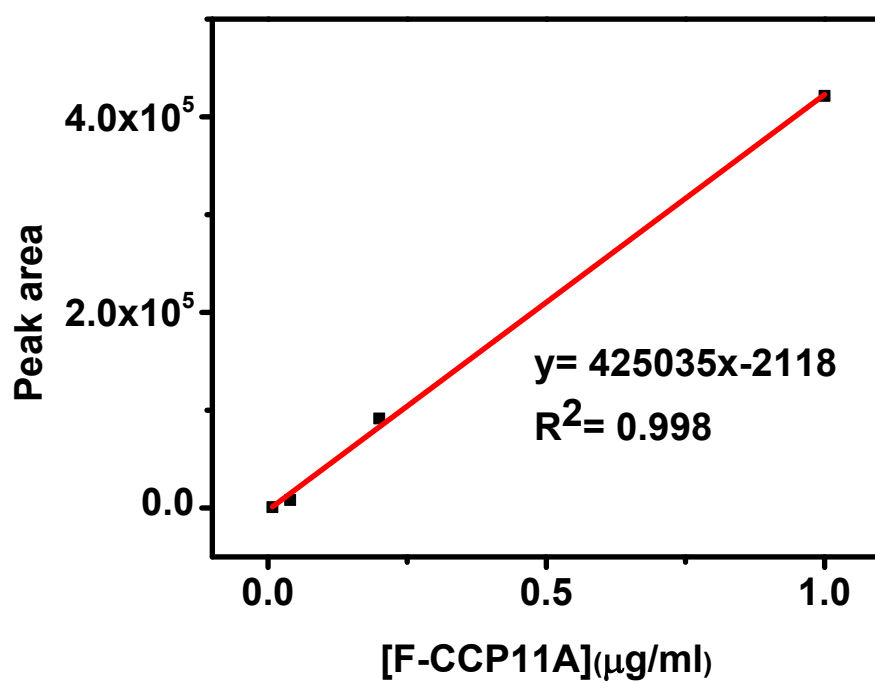

(b)

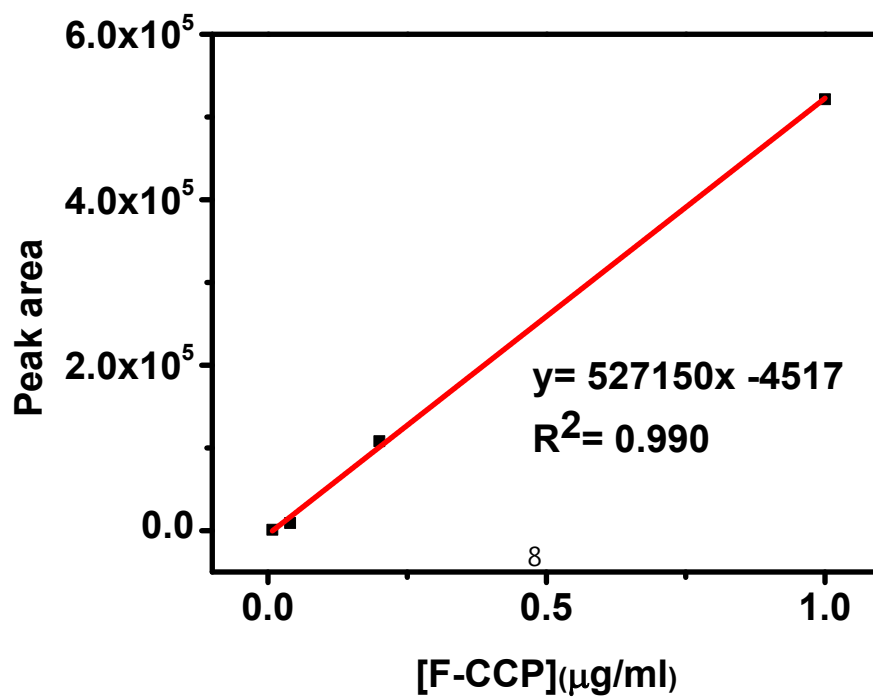



**Fig S4.** Electropherograms of immuno-reaction at 4°C, overnight. No immuno peaks were observed.

(a) F-CCP11A, (b) F-CCP

(a)

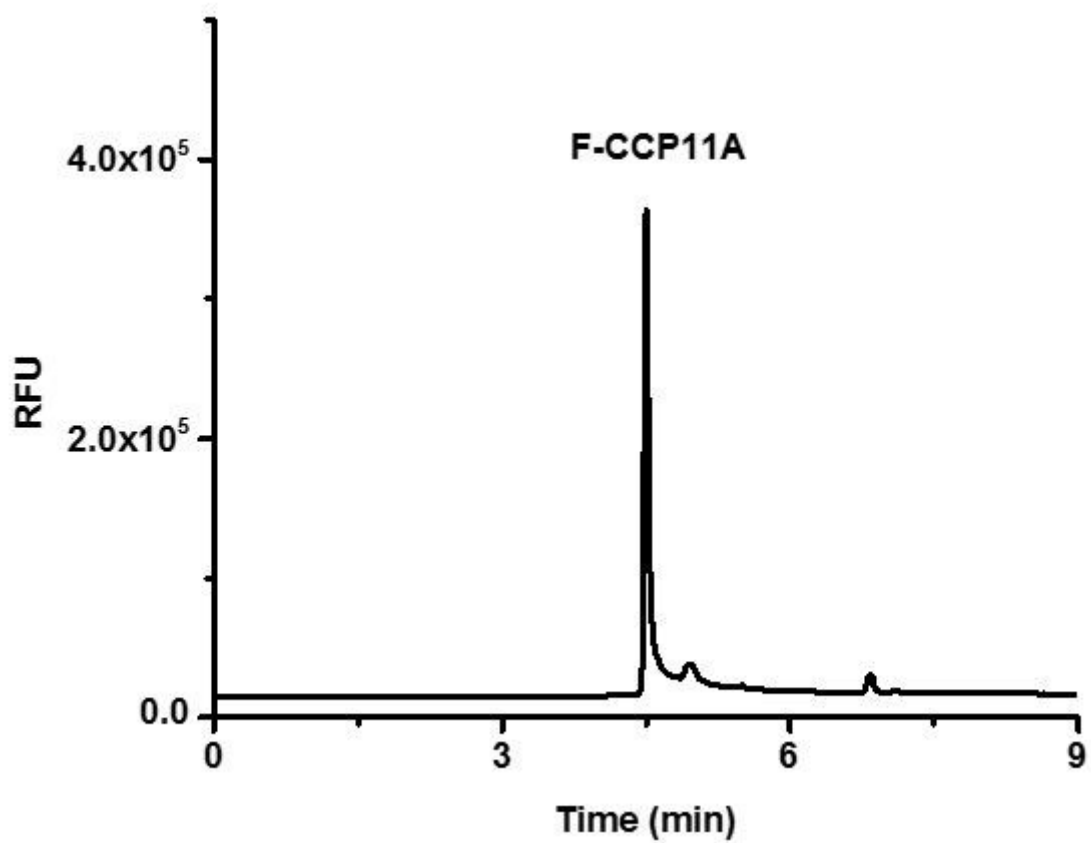

(b)

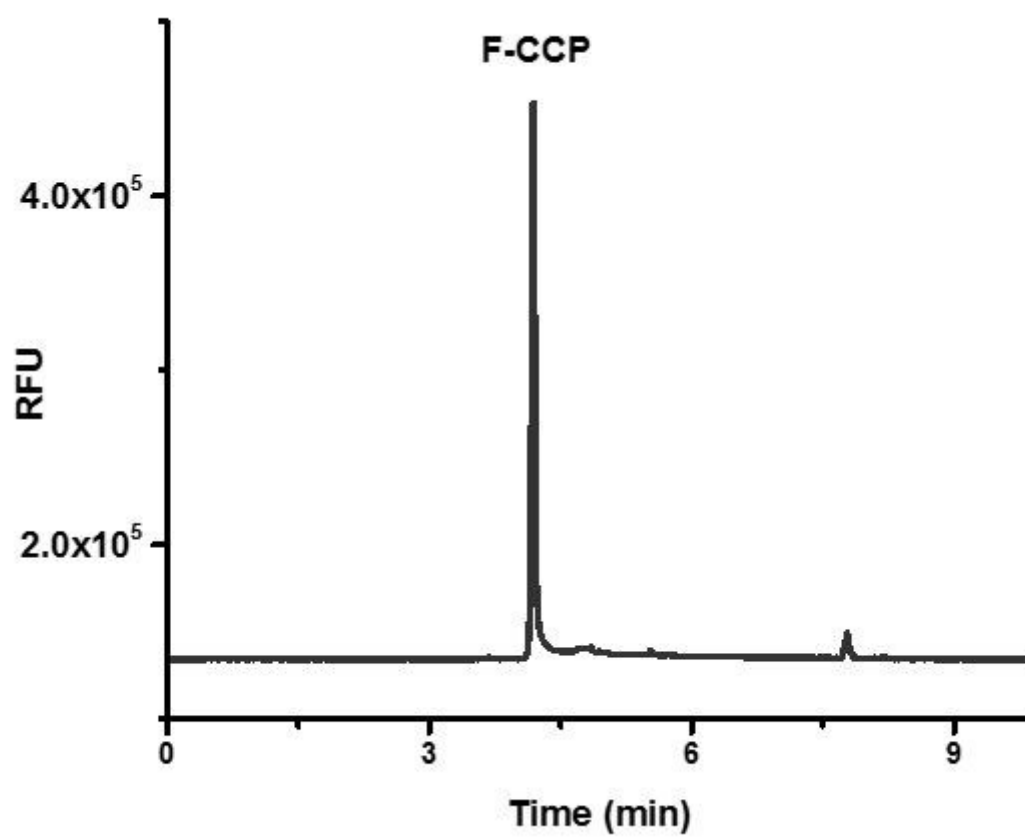

**Fig S5.** Electropherograms after immunoreaction at 37°C between CCP peptides and anti-CCP antibodies. A range of antibody concentrations varied from 0.25-16 µg/mL was treated with 0.5 µg/ml CCP peptides, incubated at 37°C, 12 h. (a) anti-CCP was diluted in PBS, (b) CCP peptides were treated with human IgG serum without the presence of anti-CCP, (c) anti-CCP was diluted in FBS.

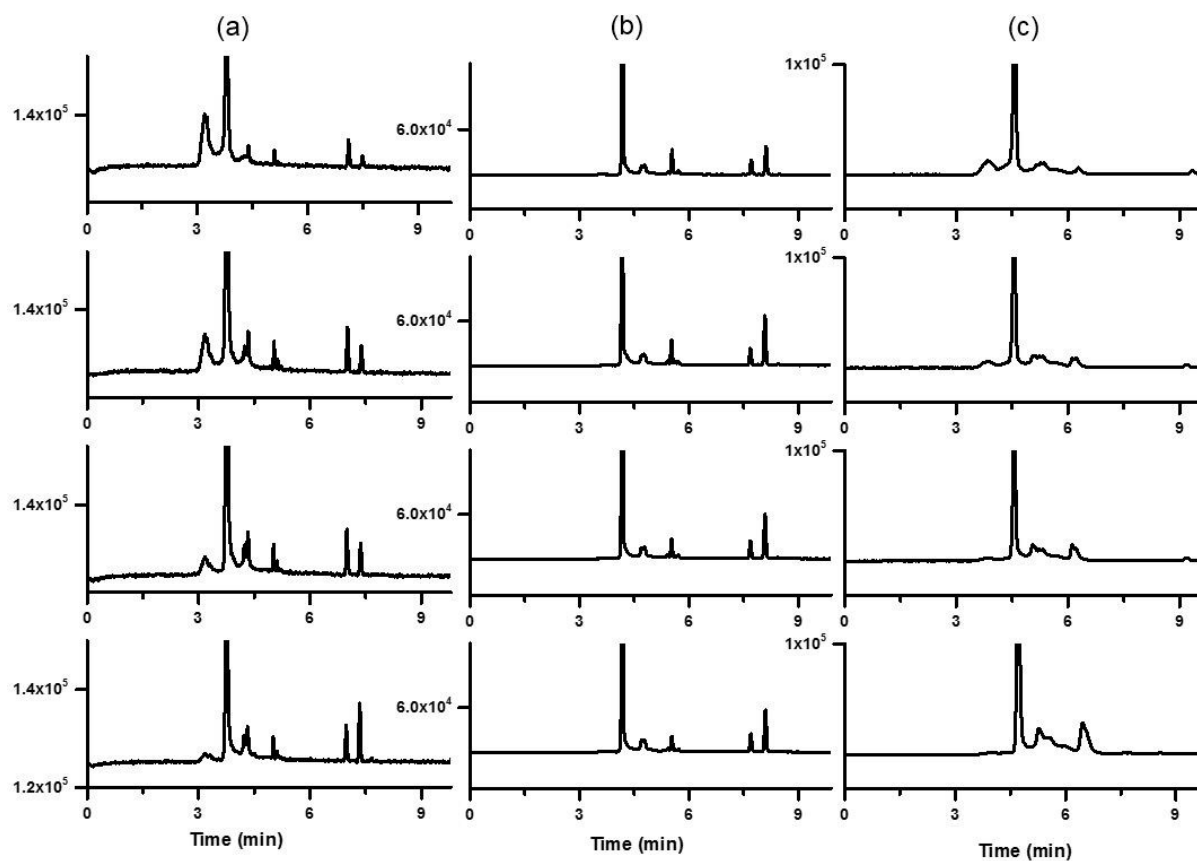

**Fig S6.** Standard curves of peak area vs. concentration for affinity binding between (a) F-CCP11A and anti-CCP and (b) F-CCP and anti-CCP immunocomplex.

(a)

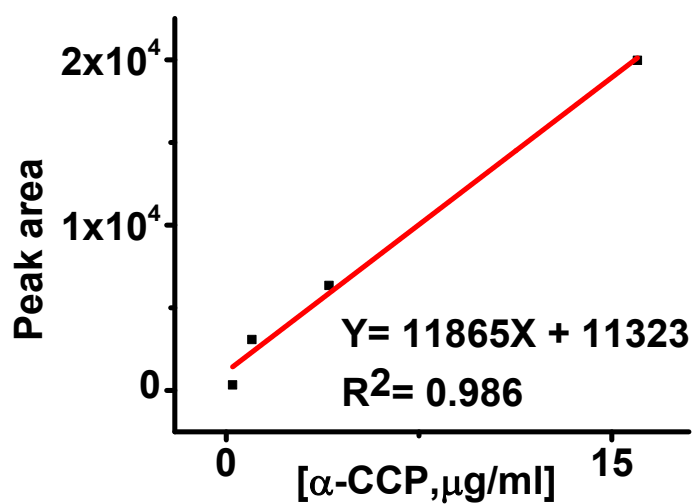

(b)

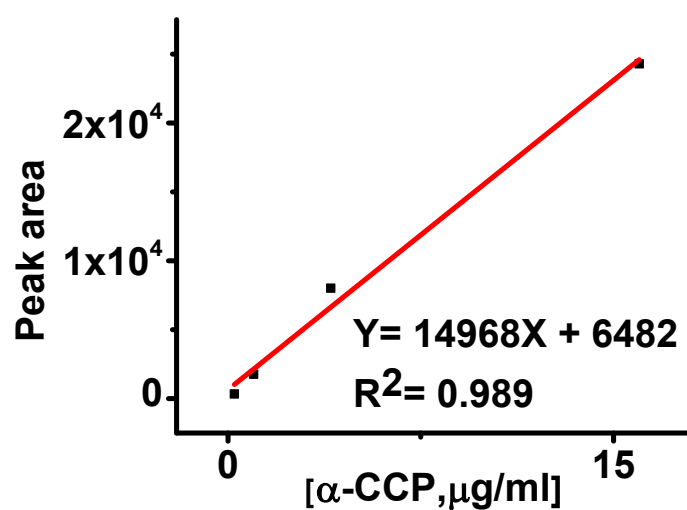

**Table 1S**

| Interday precision | QC sample (µg/mL) | Reproducibility (RSD, %) | Accuracy (%)  |
|--------------------|-------------------|--------------------------|---------------|
| F-CCP11A           | 0.5               | $2.8 \pm 1.2$            | $95 \pm 1.7$  |
|                    | 0.1               | $2.5 \pm 1.0$            | $104 \pm 2.0$ |
| F-CCP              | 0.5               | $4.6 \pm 1.5$            | $104 \pm 1.7$ |
|                    | 0.1               | $3.1 \pm 0.5$            | $107 \pm 1.5$ |

| Intraday precision | QC sample (µg/mL) | Reproducibility (RSD, %) | Accuracy (%)  |
|--------------------|-------------------|--------------------------|---------------|
| F-CCP11A           | 0.5               | $4.0 \pm 1.7$            | $105 \pm 3.5$ |
|                    | 0.1               | $3.4 \pm 1.8$            | $88 \pm 2.1$  |
| F-CCP              | 0.5               | $4.9 \pm 1.1$            | $99 \pm 5.6$  |
|                    | 0.1               | $3.8 \pm 2.2$            | $101 \pm 4.6$ |
